# Supplementary material
Source: MDPI journal article supplement (https://www.mdpi.com/2079-9276/11/4/37)
Supplement: s1 [file s1]

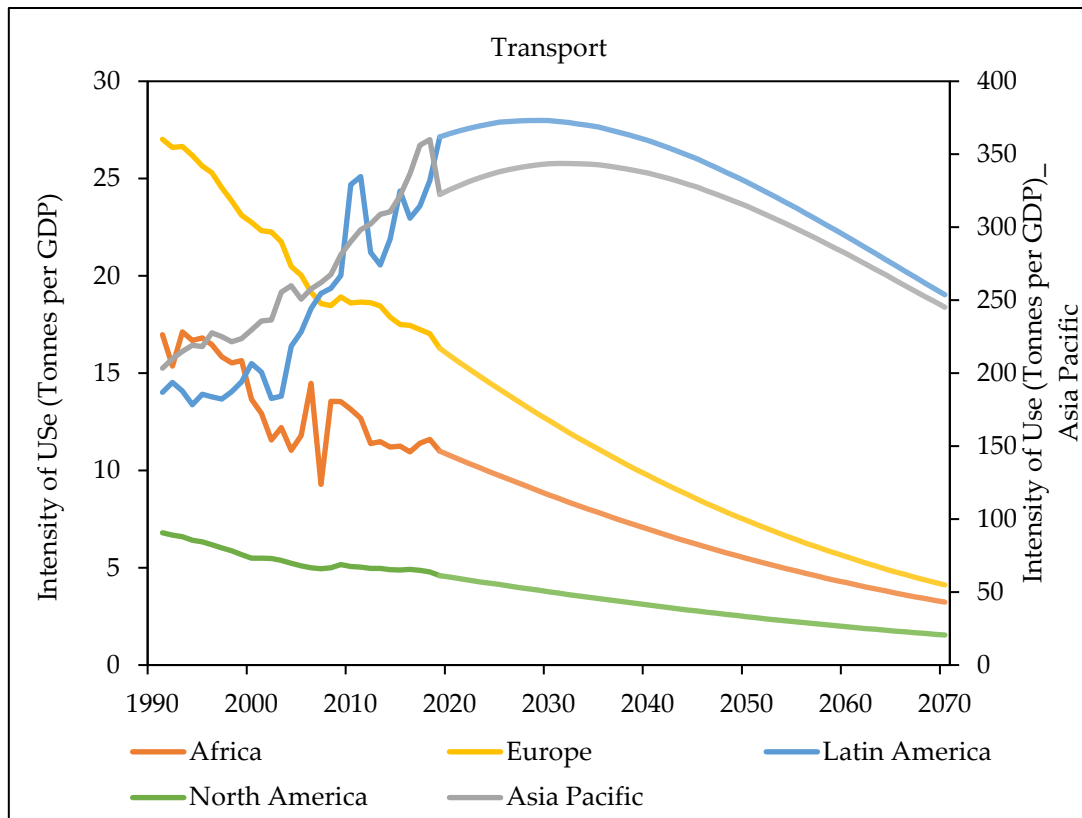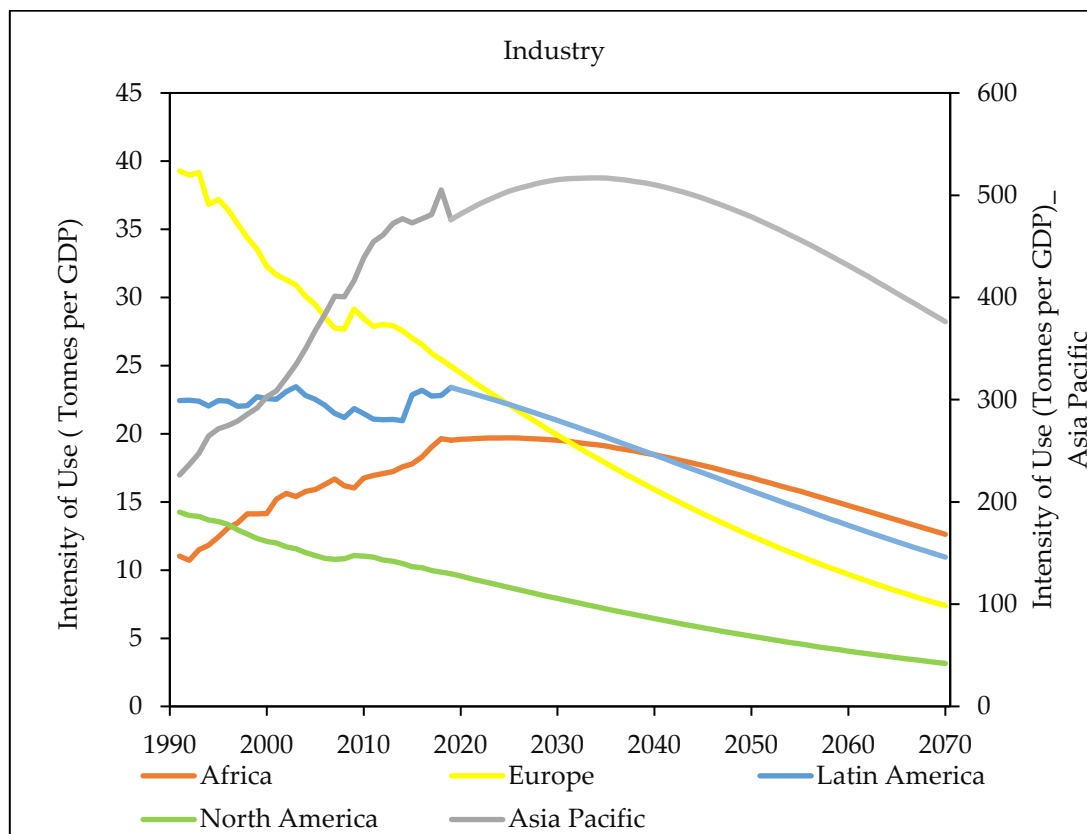

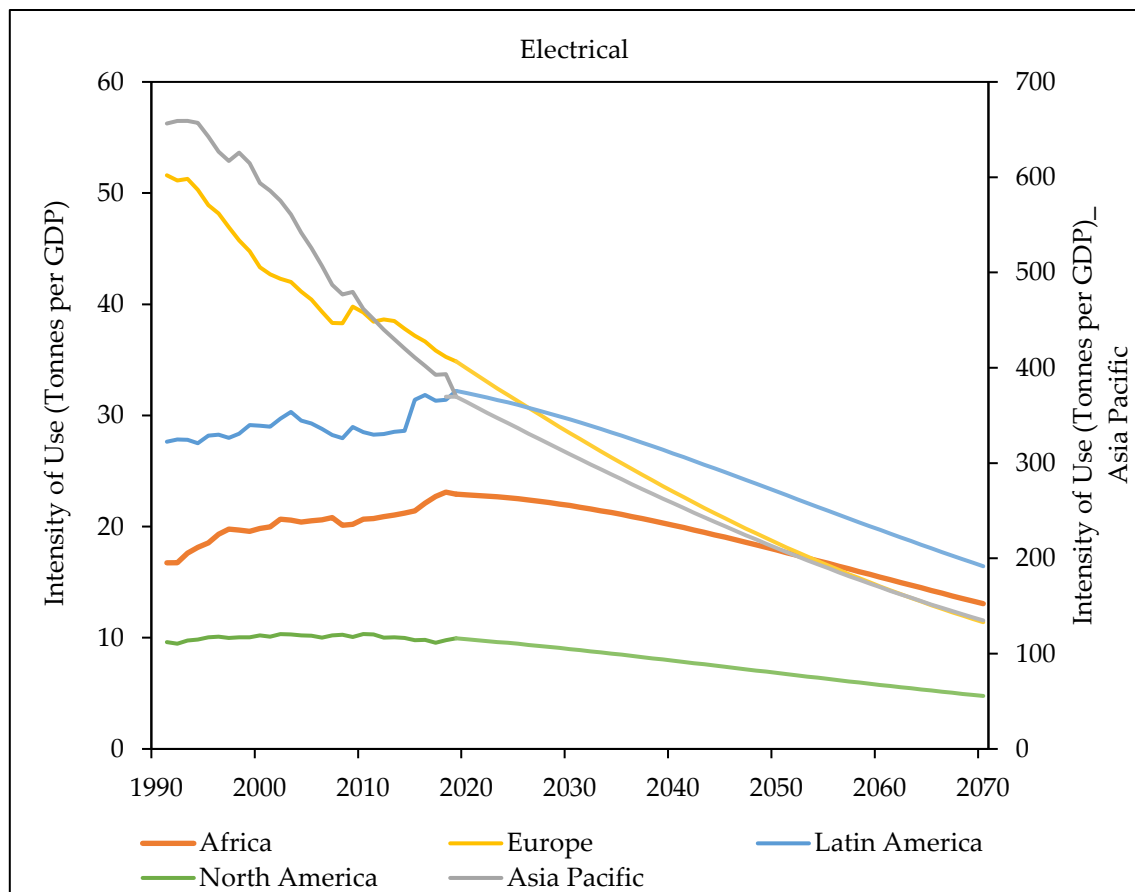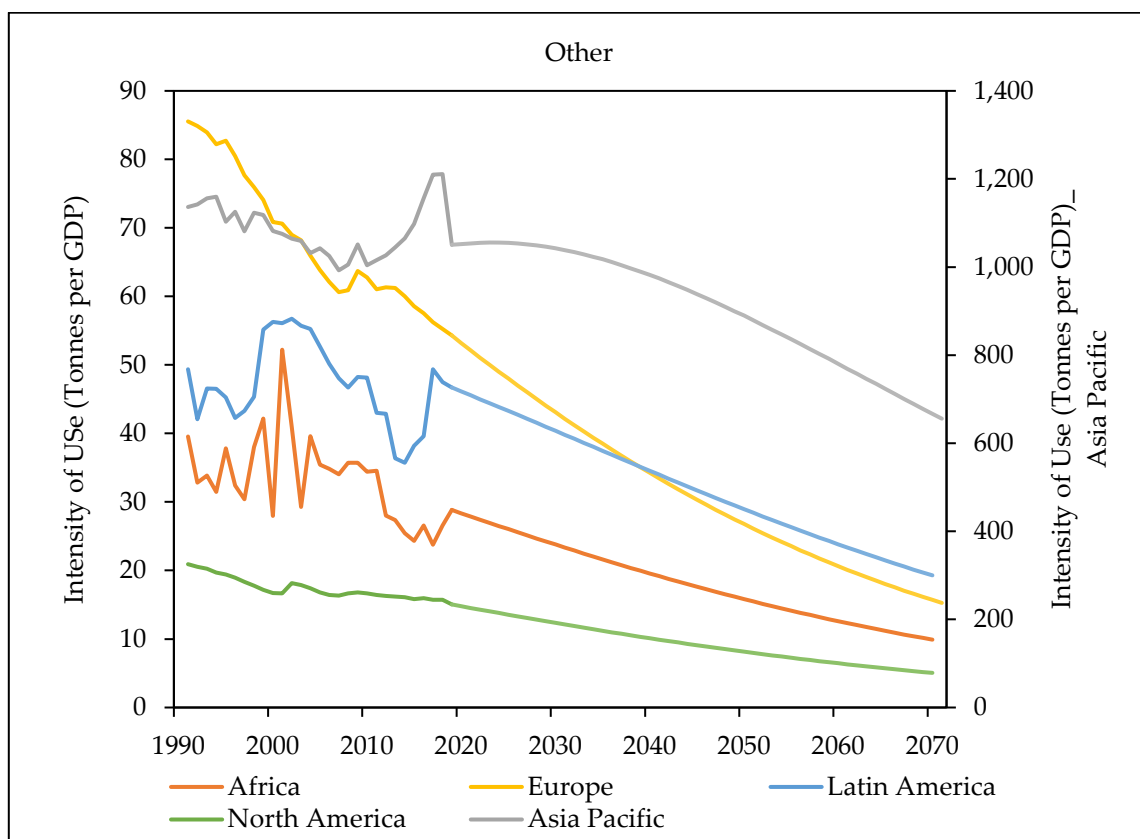

**Figure S1.** Copper Intensity of Use by sectorial share.

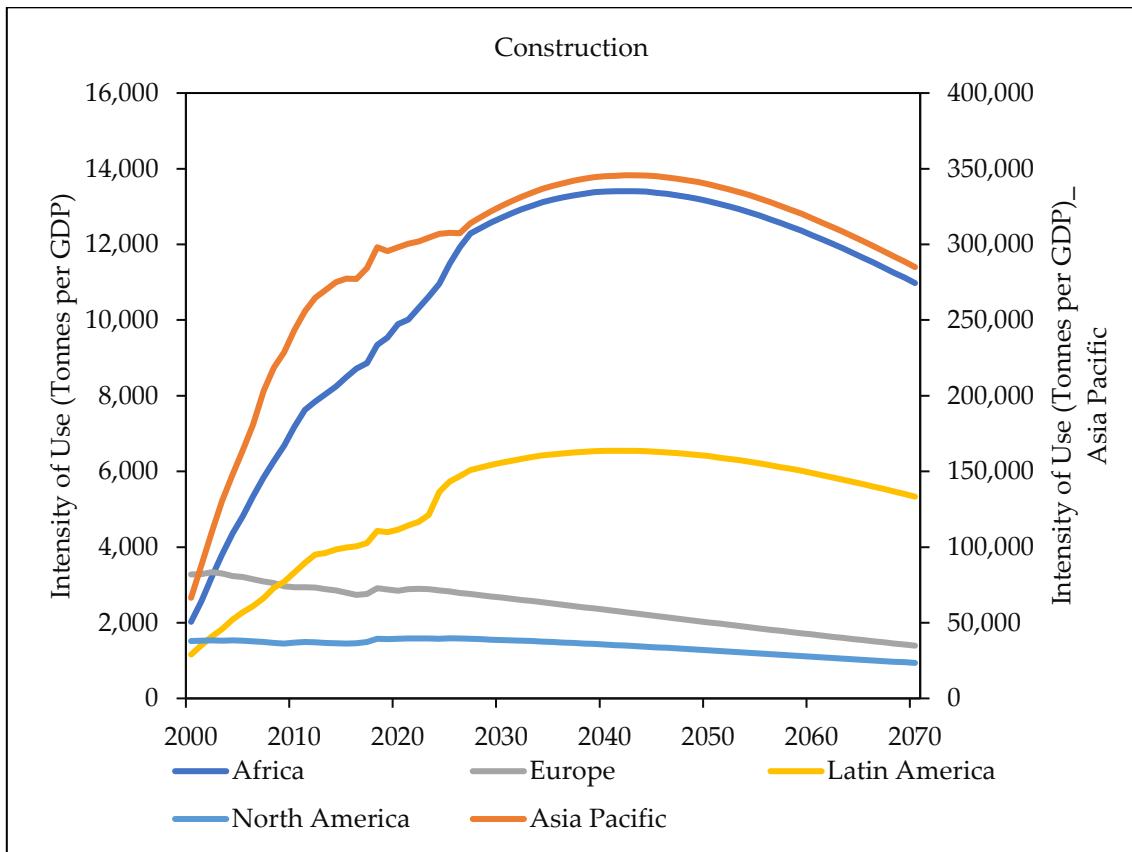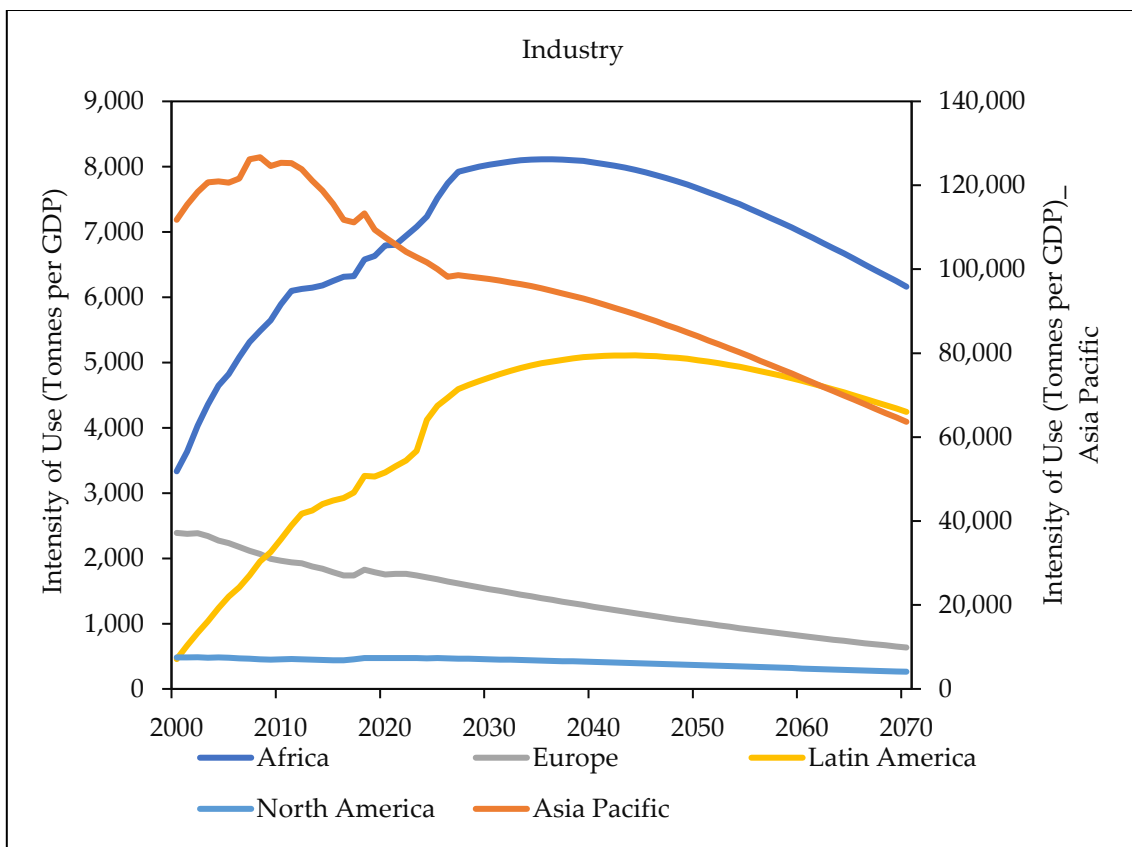

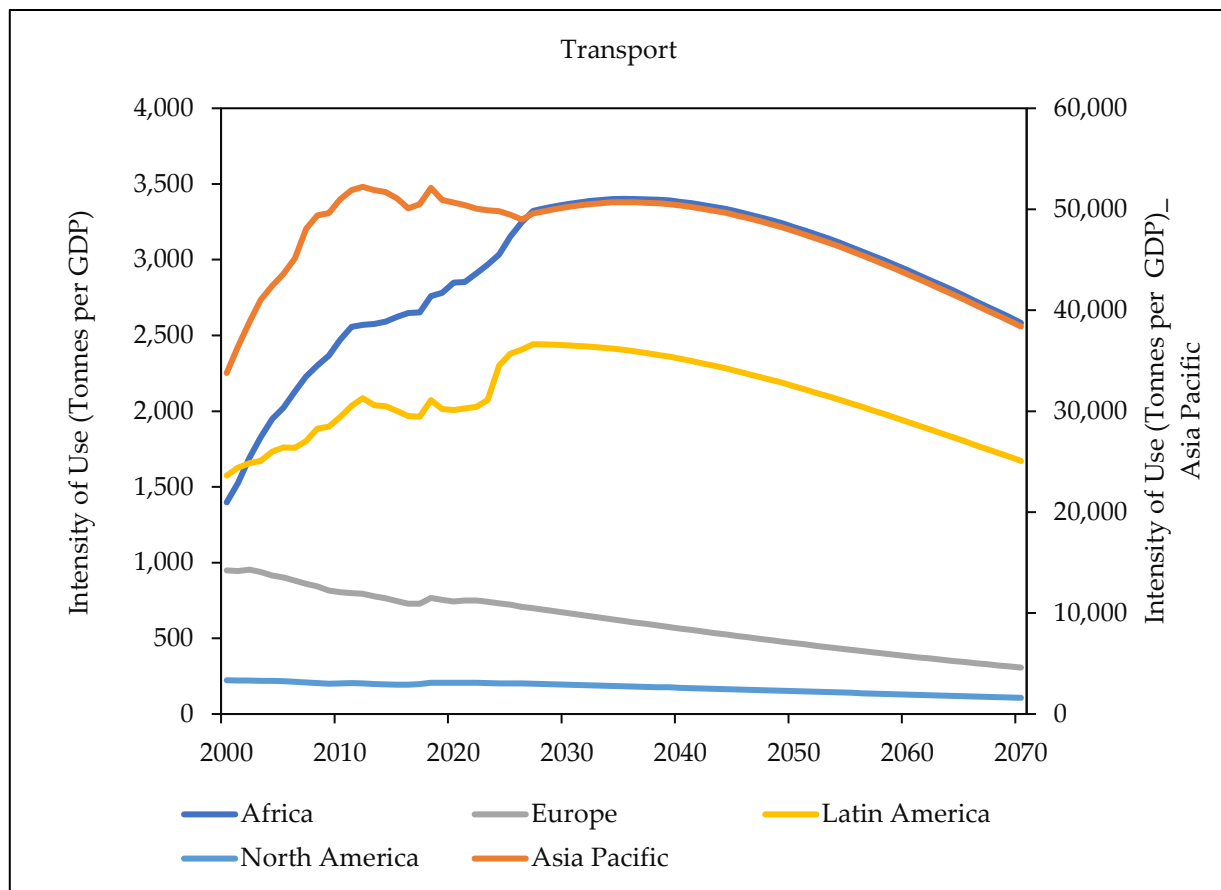

**Figure S2.** Iron Intensity of Use by sectorial share.
